# Supplementary material
Source: publisher figshare collection journal article supplement (https://gsajournals.figshare.com/ndownloader/files/25800086)
Supplement: Supplementary file 1 [file 25800086]

## Sheet: Sheet1
	Summary of RNAi experiments
	Cluster 2 DNA-binding proteins			Other Cluster 2 genes			Cluster 7 genes			Cluster 4 genes
	Gene Name	RNAi lines		Gene Name	RNAi lines		Gene Name	RNAi lines		Gene Name	RNAi lines
	Aef1	31942		CG13646	53701		fru	31593		CG3407	v108191
		v102892			v1571	Total	1	1			v34611
		v46709		nimA	v7708					CG6791	32395
	Atf-2	26210			v39046		Cluster 9 genes				v27748
	CG10669	31946			v39048		Gene Name	RNAi lines			v106627
		v104138			v104204		Adf1	28680		hang	35674
		v14732			v105009			31500			41870
	CG12071	26768		noe	32407			v4278			v23000
		v101953			v23510			v102176			v21852
	CG12605	29364			v109270		CG10959	29361			v100952
		v20250		CG16733	v47019			v16123		noc	29370
		v49556			v47020			v102191			v108422
		v108807			v105889		CG11247	31947		sd	3548
	CG15436	v39986		CG9935	28506			v52116			29352
		v39987			41852			v52117			55404
	CG17612	v19178			v7559		CG11504	31917			v101497
		v109834			v102351			42509		Smr	27068
	CG17803	29367		CG34377	v32072			v39721			34087
		v38869			v101964		CG12299	33957			v106701
		v38870			v106556			v102146			v109343
	CG18139	v16755			v107511		CG15514	31940	Total	6	20
		v40128		CG42324	v41287			v19147
		v52505			v106215			v106704		Cluster 10 genes
		v40130		rdo	v107213		CG17829	42792		Gene Name	RNAi lines
	CG18619	29542		CG3812	v109657			44104		fs(1)h	35139
		50658		dpr18	29604			v41659			41693
		v19110			v983			v110592			41943
	CG18764	v33403			v984		CG17912	27996			44009
		v107494			v45818			v45449			v51227
	CG34376	29371			v45821			v104498			v51305
		51439		Ace	25958		CG1832	27080			v108662
		v24804			v3968			v25316	Total	1	7
		v102795			v105432			v108039
	CG6765	51500		Ca-beta	29575		CG2889	v16550
		v22424			43292			v102340
		v100851			v27581		CG31388	v40254
	CG6792	v104176			v102188			v108280
		v35118			v105748		CG3227	v34494
		v35119		CG13928	28646		CG4424	43218
	CG6813	29369			v51777			v21856
	CG8159	v35841			v105306			v100975
	CG8216	27069		cpo	28360		CG5245	v27381
		v23270			v14385			v27382
		v23272		cenG1A	31228			v104740
	CG8944	31925			v37521		CG6254	v22482
		53889			v100123		Chrac-16	51155
		v36066		lbm	27278			v23925
		v36067			35459			v23926
	crc	25985			v7936			v104787
		v2934			v7937		crp	31896
		v2935			v102739			37470
		v109014		CG31030	v33095			v26885
	Eip75B	26717			v107398			v26886
		35780		CG7206	42004			v100565
		43231			v22530		CTCF	35354
		v44851			v104572			40850
		v108399		CG15522	28766			v30713
	Eip93F	v45855			v1368			v108857
		v45856			v1369		E(bx)	31193
		v45857		CG31619	55296			v46645
		v104390			v33102		fd68A	27994
	gem	26214			v104736			v45697
		40934		dpr12	28782			v110151
		v43070			v44740		lid	35706
		v43071			v44741			36652
		v48745			v48729			v42203
		v107051			v48730			v42204
	Glut4EF	v101486			v106788		Sry-beta	v37558
		v102749	Total	21	68	Total		v107758
		v105014					22	64
	l(3)neo38	51515
		v35145
		v35147
		v107927
	Lim3	26227
		34962
		v15342
		v45231
		v105746
	Mio	27059
		v109821
		v52606
		v52607
	MTF-1	33381
		34094
		52986
		v30455
		v43939
		v107124
	NC2alpha	v15451
		v108381
	nerfin-1	28324
		55395
		v12584
		v101631
	onecut	29343
		35025
		v10663
		v10665
	Side	v3065
		v3066
		v27049
	slp1	29354
		34633
		v15749
		v107562
	slp2	34634
		v37657
		v37658
	SoxN	25996
		v41079
	tll	27242
		34329
		v6236
	toe	29345
		50660
		v46515
		v107893
Total	36	118
